# Supplementary material for: Simultaneous Assessment of Urinary and Fecal Volatile Organic Compound Analysis in De Novo Pediatric IBD
Source: MDPI journal article supplement (doi:10.3390/s19204496), 2019-10-16
Supplement: s1 [file s1]

**Table S1.** Statistical analyses of Fecal VOC profiles for the discrimination of IBD from controls

|                                   | AUC [95% CI]     | Sensitivity [95% CI] | Specificity [95% CI] | PPV  | NPV  | p-value | Threshold |
|-----------------------------------|------------------|----------------------|----------------------|------|------|---------|-----------|
| <i>Sparse logistic regression</i> | 0.53 [0.25-0.81] | 0.4 [0.12-0.74]      | 0.8 [0.44-0.97]      | 0.67 | 0.57 | 0.602   | 0.140     |
| <i>Random forest</i>              | 0.53 [0.24-0.82] | 0.3 [0.067-0.65]     | 1.0 [0.69-1.00]      | 1.00 | 0.59 | 0.425   | 0.936     |
| <i>Gaussian Process</i>           | 0.69 [0.44-0.94] | 0.9 [0.55–1.00]      | 0.5 [0.19-0.81]      | 0.64 | 0.83 | 0.083   | 0.435     |
| <i>Support Vector Machine</i>     | 0.60 [0.34-0.86] | 0.8 [0.44-0.97]      | 0.5 [0.19-0.81]      | 0.62 | 0.71 | 0.218   | 0.618     |
| <i>Neural Network</i>             | 0.73 [0.47-0.99] | 0.7 [0.35-0.93]      | 0.9 [0.55-1.00]      | 0.88 | 0.75 | 0.038   | 0.499     |

Here, all the statistical analyses performed on the fecal VOC profiles are listed. For these analyses, 100 features were used in the 10 fold cross validation. The neural network analysis is identified as the best performing algorithm for the discrimination of IBD from controls based on fecal VOC profiles.

**Abbreviations:** AUC, area under the curve; CI, confidence interval; PPV, positive predictive value; NPV, negative predictive value; IBD, inflammatory bowel disease; VOC, volatile organic compounds.

**Table S2.** Statistical analyses of urinary VOC profiles for the discrimination of IBD from controls

|                                   | AUC [95% CI]     | Sensitivity [95% CI] | Specificity [95% CI] | PPV  | NPV  | p-value | Threshold |
|-----------------------------------|------------------|----------------------|----------------------|------|------|---------|-----------|
| <i>Sparse logistic regression</i> | 0.78 [0.57-1.00] | 0.8 [0.44-0.97]      | 0.7 [0.35-0.93]      | 0.73 | 0.78 | 0.028   | 0.502     |
| <i>Random forest</i>              | 0.69 [0.44-0.94] | 1.0 [0.69–1]         | 0.5 [0.19-0.81]      | 0.67 | 1.00 | 0.070   | 0.876     |
| <i>Gaussian Process</i>           | 0.35 [0.09-0.61] | 0.6 [0.26-0.88]      | 0.5 [0.19-0.81]      | 0.55 | 0.56 | 0.879   | 0.542     |
| <i>Support Vector Machine</i>     | 0.47 [0.19-0.75] | 0.4 [0.12-0.74]      | 0.8 [0.44-0.97]      | 0.67 | 0.57 | 0.604   | 0.608     |
| <i>Neural Network</i>             | 0.41 [0.14-0.68] | 0.6 [0.26-0.88]      | 0.5 [0.19-0.81]      | 0.55 | 0.56 | 0.764   | 0.293     |

Here, all the statistical analyses performed on the urinary VOC profiles are listed. For these analyses, 100 features were used in the 10 fold cross validation. The Sparse logistic regression analysis is identified as the best performing algorithm for the discrimination of IBD from controls based on fecal VOC profiles. **Abbreviations:** AUC, area under the curve; CI, confidence interval; PPV, positive predictive value; NPV, negative predictive value; IBD, inflammatory bowel disease; VOC, volatile organic compounds.
